# Determinants of high residual post-PCV13 pneumococcal vaccine type carriage in Blantyre, Malawi: a modelling study.

## 4 Authors

J. Lourenço (PhD)<sup>3\*#</sup>, U. Obolski(PhD)<sup>3#</sup>, T.D. Swarthout (MSc)<sup>1,2,#</sup>, A. Gori (PhD)<sup>4</sup>, N. Bar-Zeev (PhD)<sup>1,5</sup>, D. Everett (PhD)<sup>1,6</sup>, A.W. Kamng'ona (PhD)<sup>7</sup>, T.S. Mwalukomo (MMed)<sup>8</sup>, A.A. Mataya (MBBS)<sup>1</sup>, C. Mwansambo (MChB)<sup>9</sup>, M. Banda<sup>10</sup>, S. Gupta (PhD)<sup>3,¥</sup>, N. French (PhD)<sup>1,11¥</sup>, R.S. Heyderman (PhD)<sup>1,4,¥</sup>

\*Correspondence to: JL, [jose.lourenco@zoo.ox.ac.uk](mailto:jose.lourenco@zoo.ox.ac.uk)

# Joint first authors have contributed equally to this manuscript (Lourenço, Obolski, Swarthout)

¥ Joint last authors have contributed equally to this manuscript (Gupta, French, Heyderman)

12

## Affiliations

- 14 1. Malawi-Liverpool-Wellcome Trust Clinical Research Programme, Blantyre, Malawi
- 15 2. Clinical Sciences Department, Liverpool School of Tropical Medicine, Liverpool, United Kingdom
- 16 3. Department of Zoology, University of Oxford, Oxford, United Kingdom
- 17 4. Division of Infection & Immunity, University College London, London, United Kingdom
- 18 5. Department of International Health, Johns Hopkins Bloomberg School of Public Health, Baltimore, USA
- 19 6. The Queens Medical Research Institute, University of Edinburgh, Edinburgh
- 20 7. Department of Biomedical Sciences, College of Medicine, University of Malawi, Blantyre, Malawi
- 21 8. Department of Medicine, College of Medicine, University of Malawi, Blantyre, Malawi
- 22 9. Ministry of Health, Lilongwe, Malawi
- 23 10. Ministry of Education, Blantyre, Malawi
- 24 11. Centre for Global Vaccine Research, Institute of Infection and Global Health, University of Liverpool, United Kingdom

26

**Keywords:** pneumococcus, pcv13, modelling, malawi, intervention

28

## Abbreviations:

30

VT - vaccine type

32

NVT - non-vaccine type

PCV - pneumococcal conjugate vaccine

34

CI - confidence interval

bMCMC - Bayesian Markov-chain Monte Carlo

36

ODE - ordinary-differential equations

FOI - force of infection

38

dVP - duration of vaccine-induced protection

40

## Abstract

42

**Background:** In November 2011, Malawi introduced 13-valent pneumococcal conjugate vaccine (PCV13) into the routine infant schedule. Four to six years after introduction, rolling prospective nasopharyngeal carriage surveys were performed in the city of Blantyre. Carriage of *Streptococcus pneumoniae* vaccine serotypes (VT) remained higher than reported in developed countries, and VT impact was surprisingly asymmetric across age-groups with older individuals experiencing higher carriage reduction (35% for unvaccinated 8-9 years old, versus 26% for vaccinated 3-5 years old).

**Methods:** Bayesian Markov-chain Monte Carlo was used to fit a transmission model to age-specific VT carriage data. Simulations were used to reconstruct past and project future carriage dynamics, as well as to explore determinants of PCV13 impact across ages.

**Results:** Accumulation of naturally acquired immunity in age and age-specific transmission potentials with dominance of individuals younger than 5 years of age were key to reproduce observed post-PCV13 VT carriage. Age-groups experienced periods of faster VT carriage reduction sequentially in time, from younger to older groups. Individual-level protection against carriage (vaccine efficacy) was estimated as 68.8% (95% CI 41.6-88.1%). Population-level reduction in VT carriage (vaccine impact) over the first 10 years and among children aged 0-9 years was estimated at 70% (CI 95% 41-82%), much lower than observed elsewhere.

**Conclusions:** In Blantyre, estimated vaccine efficacy has been similar to other regions, but vaccine impact is being offset by a high, age-heterogeneous local force of infection. Such age-dependent profiles strongly determine regional PCV impact and need to be better characterised if we are to maximize intervention impact in high transmission settings.

## Introduction

64 *Streptococcus pneumoniae* (pneumococcus) is a bacterial human pathogen commonly carried asymptotically in the nasopharynx, which in a minority of carriers can cause serious disease such as pneumonia, meningitis or bacteremia<sup>1</sup>, posing a serious mortality risk, especially for young children (<5 years of age), the elderly (>65 years of age) and the immunocompromised<sup>2</sup>. Pneumococcal carriage is a necessary precursor of severe disease<sup>3</sup> and transmission, such that reduction of carriage through active control is an important, universal public health goal.

70 Currently, pneumococcal conjugate vaccines (PCV) are the best available tool to reduce carriage and disease both within risk groups and the general population. These vaccines have consisted of either 7, 10 or 13 polysaccharides conjugated to a carrier protein (PCV7, PCV10, PCV13, respectively). All have been demonstrated to be highly protective against 7, 10 or 13 of the most common pneumococcal serotypes associated with carriage and disease (also termed vaccine serotypes, VT). A common consequence of PCV introduction is the increase in both carriage and disease of non-VT pneumococci (NVT), likely due to increased niche availability and reduction of competition between VT and NVT<sup>4-9</sup>.

78 PCV routine vaccination has been a common control strategy for over a decade in developed  
countries, with past experience showing that both pre- and post-PCV pneumococcal carriage can be  
80 highly variable within and between countries<sup>10–16</sup>. PCV vaccines have only recently been introduced  
in Sub-Saharan African countries, of which Kenya<sup>17,18</sup>, Malawi<sup>19</sup>, The Gambia<sup>20</sup> and South  
82 Africa<sup>21</sup> are examples. In November 2011, Malawi introduced the 13-valent pneumococcal  
conjugate vaccine (PCV13) as part of the national extended program of immunization with a 3+0  
84 schedule (at 6, 10 and 14 weeks of age). With high routine coverage (>90%) and a small catch-up  
campaign of young children, PCV13 was expected to quickly reduce carriage as previously reported  
86 in developed countries. However, recently published data on nasopharyngeal carriage as measured  
in a cross-sectional observational study in Blantyre (Southern Malawi), four to six years after  
88 PCV13 introduction, shows that impact has been slower than expected and heterogeneous across  
age-groups<sup>22</sup>. Epidemiological mathematical models been employed successfully to improve our  
90 understanding of pneumococcal dynamics<sup>5,9,23–27</sup>, as well as having contributed to explain, estimate  
and project PCV impact<sup>8,11,28</sup>. The main advantage of models is their cost-free potential to test  
92 hypotheses and gain a mechanistic, ecological and immunological understanding of carriage and  
disease dynamics, estimating epidemiological parameters which are difficult to otherwise quantify  
94 from raw epidemiological data. For example, such models have yielded estimates of VT and non-  
VT pneumococci transmission potentials<sup>26,29–31</sup>, pneumococcal competition factors<sup>8,9,23,28,32,33</sup> and  
96 measures of PCV-induced protection from carriage at the individual level<sup>11,17,28,34,35</sup>, none of which  
are readily observed or quantified in cross-sectional observational studies.

98 In this study we use a Bayesian Markov-chain Monte Carlo fitting approach and a mathematical  
model to investigate the post-PCV13 introduction pneumococcal VT carriage dynamics in Blantyre.  
100 We find that natural immunity and age-specific transmission potentials are necessary to reproduce  
observed VT carriage. When compared to numerous literature reports from other regions, our  
102 estimated vaccine efficacy (individual-level protection from carriage) was close to expected, but  
impact (population-level reduction of VT carriage) was lower both in the short- and long-term. We  
104 show that hampered impact was likely due to a high local force of infection compared to other  
regions of the world. Our study offers key insights into the lower than expected PCV13 impact in  
106 Blantyre, and more generally on the heterogeneous nature of pre- and post-vaccination  
pneumococcal VT carriage across age-groups and regions.

## 108 **Methods**

### **Prospective cross-sectional observational study**

110 An observational study using stratified random sampling was conducted to measure pneumococcal  
nasopharyngeal carriage in Blantyre, Malawi<sup>22</sup>. Sampling was performed twice a year for a total of  
112 22.1 months, between June and August 2015 (survey 1), October 2015 and April 2016 (survey 2),  
May and October 2016 (survey 3), and finally November 2016 and April 2017 (survey 4). In this  
114 study, we use the mid-point dates of the surveys for model fitting and presentation of results.  
Nasopharyngeal swabs were collected from healthy, vaccinated 3-5 year old and unvaccinated 6-9  
116 year old children, and processed following WHO recommendations<sup>36</sup>. Isolates were serotyped by  
latex agglutination (ImmuLex™ 7-10-13-valent Pneumotest; Statens Serum Institute, Denmark).

118 Observed VT carriage levels are presented in Figure 1d. Further details on collection, processing  
and observations, have been previously reported<sup>22</sup>.

## 120 **Vaccine type transmission model**

A deterministic, ordinary-differential equations (ODE) model (Figure 1a) was developed to fit VT  
122 carriage levels as reported in the cross-sectional observational study in Blantyre (Figure 1d)<sup>22</sup>.  
Fitting was implemented using a Bayesian Markov chain Monte Carlo (bMCMC) approach  
124 developed and used by us in other modelling studies<sup>37-39</sup>, including informative priors for duration  
of carriage (Figure 1b) and uninformative uniform priors for vaccine efficacy (individual-level  
126 protection against carriage) and transmission potential. The methodology is summarised in this  
section and further details such as equations and complementary results can be found in  
128 Supplementary Text.

## 130 **Infection dynamics and population size**

As depicted in Figure 1a, the population was divided into seven non-overlapping age-groups: 0  
132 (<1), 1, 2, 3-5, 6-7, 8-9, 10+ years old. Ageing was approximated by moving individuals along age-  
groups with a rate ( $a_{\text{age-group}}$ ) equal to the inverse of the time spent at each age class. The seven age-  
134 groups were further divided into vaccinated ( $S_{\text{age-group}}^V$ ,  $C_{\text{age-group}}^V$ ) and unvaccinated ( $S_{\text{age-group}}$ ,  $C_{\text{age-group}}$ )  
susceptibles (S) and carriers (C). The population size was assumed to be constant, with total deaths  
136 equal to births (details in Supplementary Text). Death rates were age-specific ( $\mu_{\text{age-group}}$ ) and relative  
to a generalized total life-span of 70 years.

138

### **Natural immunity**

140 Pneumococcal colonization increases both humoral (anti-capsular serotype-specific and anti-protein  
non-serotype-specific) and T-cell (anti-protein) immunity<sup>40</sup>. Acquisition of this immunity correlates  
142 with colonization in children and increases with age as colonization decreases. In our model, all  
individuals were assumed to be born susceptible but could acquire infection (colonization) at any  
144 age with a particular force of infection  $\lambda_{\text{age-group}}$ , becoming carriers ( $C_{\text{age-group}}$ ) for an age-specific  
period ( $1/\gamma_{\text{age-group}}$ ), and returning to the susceptible state ( $S_{\text{age-group}}$ ) after clearance. Hence, the  
146 development and accumulation of complete (sterile) immunity to the pneumococcus was not  
considered. We nonetheless allowed for decreasing duration of carriage with age ( $1/\gamma_{\text{age-group}}$ ) as a  
148 proxy for the development of immunity with age. To quantify such differences in age, we used  
carriage duration data as reported by Hogberg and colleagues<sup>41</sup> to define informative priors related  
150 to the aggregated age-groups: 0-2 years ( $1/\gamma_{0-2}$ ), 3-5 years ( $1/\gamma_{3-5}$ ), 6-8 years ( $1/\gamma_{6-8}$ ), and 8+ years ( $1/\gamma_{8+}$ )  
as represented in Figure 1b.

152

### **Vaccination and vaccine efficacy**

154 For simplicity, routine vaccination was implemented at birth with coverage ( $\rho$ ) at 93%<sup>22</sup>, and catch-  
up ( $k$ ) implemented as a one-off transfer of a proportion of individuals from the unvaccinated  
156 susceptibles with 0 (<1) years of age ( $S_0$ ) to the vaccinated susceptible class with the same age ( $S_0^V$ )

with coverage of 60%<sup>22</sup>. We assumed the vaccine to reduce the risk of infection (colonization) of vaccinated individuals by a proportion  $\zeta$  (between 0 and 1, with  $\zeta=1$  equating to no risk). This reduction in risk was herein defined and interpreted as the individual-level vaccine efficacy against carriage ( $VE=100 \times \zeta$ ), and was modelled directly on the force of infection ( $\lambda$ )(Figure 1a).

## 162 Vaccine impact

We measured vaccine impact across ages as the post-PCV13 percent reduction in population-level pneumococcal VT carriage compared to pre-vaccination levels.

## 166 Force of Infection

We used an inhomogeneous transmission matrix (Figure 1c) based on epidemiological studies conducted in American, European and African populations reporting strong, intrinsic variation in frequency, efficiency and environmental risk of transmission between age-groups<sup>10,31,42-47</sup>. In summary, we defined an age-specific transmission matrix, generally populated with a baseline coefficient  $\beta$ , and a different coefficient  $\theta$  assigned to transmission occurring within and between ages 0-5 years, and within 6-7 and 8-9 years of age. This formulation followed reports of strong age-assortative patterns and higher contribution of younger individuals to transmission<sup>31,43,47</sup>.

174

### Fitting to survey data

The model's carriage outputs for vaccinated 3-5 (V3-5y), unvaccinated 6-7 (NV 6-7y) and 8-9 (NV8-9y) years of age, were fitted to observed levels in Blantyre between 2015 and 2017, approximately four to six years post-vaccination (Figure 1d). A total of seven parameters were fitted: vaccine efficacy against carriage ( $\zeta$ , uninformative prior), coefficients of transmission ( $\beta$ ,  $\theta$ , uninformative priors) and durations of carriage in ages 0-2, 3-5, 6-7, 8+ years ( $1/\gamma_{0-2}$ ,  $1/\gamma_{3-5}$ ,  $1/\gamma_{6-8}$ ,  $1/\gamma_{8+}$ , informative priors, Figure 1b). The transmission model was initialized at time  $t=0$  with a proportion of susceptibles of 0.99 and infected 0.01, with numerical simulations run until an equilibrium was reached. At equilibrium, vaccination was introduced and the first 15 years recorded. Levels of carriage in the model were calculated as the proportion of individuals within an age-group that are carriers (i.e.  $C/(S+C)$ , see Supplementary Text for expressions). The model was run with parameters scaled per year. MCMC chains were run for 5 million steps, with burn-in of 20%.

## 188 Results

### 190 Observational study and modelling objectives

VT carriage levels as reported in the observational study (Figure 1d), approximately four to six years after the introduction of PCV13 in Blantyre, showed a surprisingly slow mean reduction of 26% for the vaccinated 3-5 age-group (from 23%, CI 95% 17.9-27.1%, to 17%, CI 95% 13.4-

194 21.2%)<sup>22</sup>. In contrast, the mean observed reduction in VT carriage for the unvaccinated 6-7 age-  
group was higher, at 31% (from 26%, CI 95% 20-31.9%, to 18%, CI 95% 12.2-22.1%) and for the  
196 unvaccinated 8-9 age-group it was even higher at 35% (from 20%, CI 95% 15.8-23.6%, to 13% CI  
95% 9.3-17.4%). We hypothesised that the faster reduction in the older age groups was likely to be  
198 due in part to indirect protection through a reduction in transmission, as reported in other countries  
such as the USA and UK<sup>48,49</sup>. We performed a literature review on observed reduction of VT  
200 carriage in time after the introduction of PCV13 vaccines (Table S4), and concluded that residual  
17% of VT carriage in the vaccinated 3-5 age-group, 6 years after PCV13 introduction, was high  
202 when compared to other countries. For instance, residual carriage of PCV13 types was 0.4% after 4  
years of vaccination in England<sup>50</sup>, 9.1% after 2 years of vaccination in Italy<sup>51</sup>, and 7% after 3 years  
204 of vaccination in Alaska, USA<sup>16</sup> (more examples in Table S4).

We resorted to our deterministic transmission model and bMCMC approach to fit the observed post-  
206 vaccination VT carriage data from Blantyre (2015 – 2017). Based on this fit, we could reconstruct  
carriage dynamics for the unobserved first four years (2011 – 2015), and project VT carriage  
208 reduction into the future, to identify the mechanistic nature of the slow PCV13 impact on the  
vaccinated age-group and strong herd-effects in the older unvaccinated age-groups.

210

### Model fit and posteriors

212 VT carriage levels across age-groups reported from the surveys were closely reproduced by the  
mean and 95% CI of the model using the bMCMC approach (Figure 2a). Our initial assumption of  
214 natural immunity accumulating with age was generally respected in the bMCMC solution (Figure  
2b); i.e. the estimated posterior distributions of the durations of carriage ( $1/\gamma_{\text{age-group}}$ ) were similar to  
216 the informed priors for the groups 0-2 and 3-5 years of age, and were adjusted by the bMCMC by  
approximately +0.6 and -1.8 days for the groups 6-7 and 8+ years of age, respectively. The posterior  
218 distribution of vaccine efficacy (individual-level protection against carriage) across ages was  
estimated to be 68.8% (95% CI 41.6 – 88.1). While we used an uninformative prior (uniform, 0 to  
220 1) in the bMCMC, this posterior was similar to others recently estimated with different models and  
in multiple epidemiological settings (Figure 2c); and we therefore argue that it serves as partial  
222 validation for the robustness of the modelling framework. Finally, the solutions for the transmission  
coefficients  $\beta$  and  $\theta$  suggested that in order to reproduce the Blantyre survey data, the risk of  
224 infection associated with contacts within and between younger age-groups (0-5 years old) would  
have to be higher than that of the general population (i.e.  $\theta \gg \beta$ ). Literature support for all estimated  
226 posteriors is detailed in Supplementary Text.

### 228 Vaccine impact across age-groups

Using parameter samples from the bMCMC estimated posteriors, we simulated vaccine impact in  
230 terms of VT carriage reduction across age-groups in the first 10 years post-vaccination (Figure 3).

After the first year, reduction in VT carriage was estimated to be 38% (23 - 44, CI 95%) for the 0  
232 (<1) years old, followed by 23% (15 - 26, CI 95%) for the 1 years old, 12% (8 - 13, CI 95%) for the  
2 years old and 7% (5 - 8, CI 95%) for 3-5 years old (Figure 3a). With time, as carriage generally

234 dropped and vaccinated individuals aged, the older groups were estimated to benefit from  
increasingly similar reductions in carriage compared to the initially vaccinated group. Since during  
236 the first year only the 0 (<1) years of age were vaccinated, the short-term reductions in carriage of  
the other groups were due to indirect herd-effects alone.

238 At the target point of 10 years into the post-vaccination era, impact was estimated to be similar  
across all age-groups, with VT carriage reduced by 71% (CI 95% 42-81%) for the 0 (<1) years old,  
240 69% (CI 95% 41-80%) for the 1 years old, 68% (CI 95% 42-80%) for the 2 years old and 69% (CI  
95% 42-79%) for 3-5 years old. We further projected vaccine impact on aggregated age-groups 0-5  
242 and 6-9 years of age, which showed equivalent reductions in VT carriage (Figure 3b), with the  
larger aggregated age-group 0-9 years old having a reduction of 70% (CI 95% 41-82) after 10 years.

244

### **Post-vaccination changes in force of infection**

246 The model had so far been able to reproduce survey data on VT carriage of vaccinated and  
unvaccinated individuals, with projections further suggesting that impact on older age-groups would  
248 be slower to gain momentum but would eventually converge to the observed impact on younger  
age-groups. To try to understand these non-linear and asynchronous responses to vaccination across  
250 age-groups, we explored the post-vaccination dynamics of the force of infection (FOI). The FOI is a  
useful epidemiological measure as it is the overall rate by which a certain age-group of susceptible  
252 individuals is infected, comprising the transmission rate ( $\beta$  or  $\theta$ ) weighted by the number of  
infectious individuals within the same and other age-groups.

254 Although we modelled six independent age-groups under 10 years of age, only three unique FOIs  
are defined in the transmission matrix for individuals under 9 years of age (0-5, 6-7 and 8-9 years of  
256 age, Figure 1c). As expected by the posteriors of  $\beta$  and  $\theta$ , the absolute FOI of these age-groups was  
originally different and decreased in time after the introduction of PCV13 (Figure S4). We looked at  
258 the FOI derivative in respect to time as a measure of speed of reduction (Figure 4), and found that  
the time period of fastest FOI reduction for the 0-5 years old was between the years 2012 and 2014  
260 (when no carriage data was collected), while for the older age-groups the period of fastest reduction  
was predicted to be just before or during the observational study (for 6-7 and 8-9 age-groups,  
262 respectively).

This temporal response suggested that although there is now a rather slow reduction of VT carriage  
264 in Blantyre for the younger age-groups, this seems to have been preceded by period of high, short-  
term impact on VT carriage for that age-group (also seen in dynamics of Figure 3b). Similarly, the  
266 surprisingly faster reduction in VT carriage observed during the surveys for the older age-groups is  
predicted by the model to take place specifically during the years of the surveys. Overall, projected  
268 FOI dynamics suggest that impact of the vaccine is non-linear in time within age-groups, with  
predicted periods of faster reductions in VT carriage being witnessed by different ages in a  
270 sequential manner, from younger to older individuals.

### **272 Sensitivity of vaccine impact based on transmission setting**

274 The projected impacts of Figures 3 and 4 were based on the estimated transmission coefficients for  
Blantyre (Figures 1c and 2d). To contextualize this particular transmission setting, we searched the  
276 literature for pre-vaccination VT carriage levels in other countries (Table S5). The reported age-  
groups were highly variable, and we therefore focused on the 0-5 years old group for which more  
278 data points were available from a range of countries in North America, Africa, Europe and South-  
east Asia (Figure 5a). Reported VT carriage in this age-group was highly variable both between and  
within countries, with our estimation for Blantyre being on the higher end (62%, 95% CI 37 - 76%).  
280 We further searched the literature for post-vaccination VT carriage levels in other countries and  
again focused on the age-group 0-5 years old for which more data points were available (Table S4,  
282 points with whiskers in Figure 5b). The projected impact for Blantyre according to our model  
(dashed line), was notably lower than observed for other countries. A Malawi data point reported in  
284 the context of the Karonga District (Northern Malawi) had the closest impact to our projections in  
Blantyre (Southern Malawi), 4 to 5 years after PCV13 introduction<sup>19</sup>.  
286 Given that our posterior of vaccine efficacy (individual-level protection against carriage, Figure 2c)  
was close to estimations from other regions of the world, we hypothesised that both the higher pre-  
288 and post-PCV13 VT carriage levels in Blantyre were likely due to a higher local force of infection  
compared to other regions. To demonstrate this, we simulated a range of alternative transmission  
290 settings in Blantyre, by varying both the transmission coefficients ( $\beta$  and  $\theta$ ) between -70% and  
+120% of the estimated posteriors. This sensitivity exercise showed that lowering local  
292 transmission by -30% was sufficient for the model to approximate short- and long-term vaccine  
impact observed in several other countries (Figure 5b). Other age-groups, for which far less data  
294 points were available, presented similar patterns (Figures S2 and S3).

## Discussion

296 Using a dynamic model, we have reproduced observed changes in pneumococcal VT carriage  
following the introduction of PCV13 in Blantyre (Malawi). Similarly to other modelling  
298 frameworks we have considered the accumulation of natural immunity with age and have also  
allowed for heterogeneous transmission potentials within and between age-groups. Including these  
300 factors allowed us to characterise both vaccine-related and host age-dependent determinants of post-  
PCV13 pneumococcal VT transmission.

302 A main motivation for this study was the observation of high residual VT carriage levels six years  
post-PCV13 introduction<sup>22</sup>. Studies from Kenya, The Gambia and South Africa have reported  
304 similar trends, with VT carriage remaining higher than in industrialised countries at similar post-  
vaccination time points. Compared to studies from other geographical regions (Figures 2c, 5a, 5b,  
306 Supplementary Material), pre- and post-vaccination VT carriage in Blantyre was at the upper end of  
reported values across many countries. Given that our estimate of vaccine efficacy (individual-level  
308 protection against carriage) was similar to reports from elsewhere, we tested the hypothesis that the  
observed and projected lower vaccine impact was likely a result of a higher force of infection in  
310 Blantyre compared to other regions. This force of infection was found to be characterised by  
different transmission potentials within and between age-groups, and particularly dominated by  
312 individuals younger than 5 years. Reflecting a variety of approaches and assumptions that can be  
found in other models<sup>8,11,28</sup>, our framework is not able to discern if this assortative relationship with



314 age is due to age-specific contact type patterns or susceptibility to colonization. Nonetheless, our  
316 results strongly argue for the need of more research characterising local contact, risk and  
transmission-route profiles (e.g.<sup>42</sup>), if we are to understand the myriad of reported PCV impacts  
across different demographic, social and epidemiological settings.

318 There was also the unexpected observation that vaccine impact (reduction in carriage), four to six  
320 years post-PCV13, was higher in the older unvaccinated age-group. The dynamic model helped  
322 explain this, by showing that age-groups can experience periods of faster vaccine impact at different  
time points, from younger to older groups, as a likely consequence of routine vaccination at very  
324 early age, vaccinated cohort ageing and age-specific transmission potentials. Similarly to the  
conclusions of another modelling study<sup>28</sup>, our results thus advocate for the essential role of dynamic  
models to understand and project VT carriage, by critically accounting for local non-linear effects  
of pneumococcal transmission and vaccination.

326 Critical for developing countries, as well as global initiatives such as Gavi, is that the impact of  
328 PCVs on pneumococcal VT carriage and transmission needs to be further improved if we are to  
maximize disease reduction. For countries like Malawi, in which post-vaccine VT carriage data  
330 suggests that local epidemiological factors may dictate lower vaccine impact than elsewhere,  
region-specific improved vaccination schedules<sup>19,22</sup> and catch-up campaigns<sup>28</sup> could help speed-up  
VT carriage reduction and maximise cost-effectiveness. For this to be possible, we need to better  
332 understand local transmission profiles across ages, which are likely dictated by demographic and  
socio-economic factors, and strongly determine short- and long-term PCV impact as demonstrated  
334 in the case of Blantyre.

## Limitations

336 Data suggests that immune responses to PCV vaccines wane with time from vaccination<sup>22,34</sup>. In a  
338 meta-analysis study, PCV7 efficacy was estimated at 62% (CI 95% 52-72%) at four months post-  
vaccination, decreasing to 57% (CI 95% 50-65%) at six months, but remaining 42% (CI 95% 19-  
54%) at five years post-vaccination<sup>34</sup>. Models implicitly parametrising for duration of vaccine-  
340 induced protection (dVP) have typically followed a prior with minimum mean duration of six  
years<sup>8,11,28,34</sup>, but in one study dVP was estimated as 8.3 years (95% CI 5 – 20)<sup>8</sup>. Our framework does  
342 not explicitly include dVP. In the context of these reported time ranges, and since we fit data up to 6  
years post vaccine introduction, further restricting our analyses to the first 10 years, we argue that  
344 our projections should be robust. In light of the possibility that dVP is shorter than previously  
reported<sup>22</sup>, our projections of vaccine impact should be seen as a best-case scenario; i.e. real long-  
346 term vaccine impact in Blantyre would likely be lower than projected by our model.

Our framework also does not include niche competition between VT and non-VT  
348 pneumococci<sup>11,28,34</sup>. It is difficult to assert the impact of such competition in our main results, but its  
unlikely that our main conclusions would be affected, since they are mostly based on factors (e.g.  
350 age-specific transmission) which have not been reported to be associated with type competition  
directly.

## 352 **Conclusion**

354 In Blantyre, vaccine efficacy (individual-level protection against carriage) across ages and time is  
356 estimated at 68.8% (95% CI 41.6 – 88.1), similar to reports from other countries. However, local  
358 transmission potential is likely to be higher than in such countries, and also heterogeneous among  
360 age-groups, with a particular contribution from younger children. While PCV13 is achieving  
positive outcomes in Blantyre<sup>19,52</sup>, such local higher force of infection is dictating a much lower  
long-term vaccine impact (population-level carriage reduction) than reported elsewhere. Finally, the  
combination of age-related transmission heterogeneities and routinely vaccinating infants has led to  
non-linear responses in terms of vaccine impact across ages and time, with general implications on  
post-vaccination VT carriage data interpretation.

## 362 **Acknowledgements**

364 We would like to thank Ellen Heinsbroek for key literature references used in this manuscript, and  
366 Stefan Flasche for useful information regarding raw data of published studies. We thank the  
368 individuals who participated in this study and the local schools and authorities for their support. We  
are grateful to the study field teams (supported by Farouck Bonomali and Roseline Nyirenda) and  
the study laboratory team. We are grateful to the MLW laboratory management team (led by  
Brigitte Denis) and the MLW data management team (led by Clemens Masesa).

## **Funding**

370 Bill & Melinda Gates Foundation, Wellcome Trust UK, Medical Research Council, European  
Research Council, EMBO.

## 372 **Contributions**

374 JL, UO, TDS designed the modelling study. JL and UO designed the model. JL implemented the  
376 model and the fitting approach. JL, UO analysed and interpreted model output. JL and UO searched  
and curated the literature data. TDS supervised, while AG, NBZ, DE, AWK, TSM, AAM, CM and  
378 MB collected and curated the Malawi observational data. SG, NF and RSH supervised both the  
modelling and observational sides of the study. JL wrote the first draft of the manuscript which all  
authors revised. JL, UO and TDS revised other iterations of the manuscript. All authors revised the  
last version of the manuscript.

## 380 **Declaration of interests**

No other competing interests were reported by authors.

382

## Figure legends

384

**Figure 1: Transmission model framework and survey data.** (a) Seven age-groups were modelled: 0, 1, 2, 3-5, 6-7, 8-9, 10+ years of age (circles), each divided into unvaccinated (top) and vaccinated (bottom). Labels  $a_{\text{age-group}}$  mark ageing rates per age class;  $\mu_{\text{age-group}}$  mark age-specific death rates;  $b$  marks births, at which point a proportion ( $\rho$ ) are vaccinated (purple);  $\zeta$  marks vaccine-induced protection, expressed as reduction in susceptibility to infection of vaccinated individuals (magenta);  $\lambda_{\text{age-group}}$  mark age-specific forces of infection;  $\gamma_{\text{age-group}}$  mark age-specific rates of clearance from infection;  $k$  marks catch-up vaccination (green). (b) The informative priors used in the fitting exercise for mean (standard deviation) infectious periods (days) of 47 (1.8) for 0-2 years old; 34 (1.3) for 3-5 years old; 26 (1.4) for 6-8 years old; 26 (2.0) for 8+ years old (taken from [1]). The posterior values of these periods ( $1/\gamma_{0-2}$ ,  $1/\gamma_{3-5}$ ,  $1/\gamma_{6-8}$ ,  $1/\gamma_{8+}$ ) are estimated when fitting the survey data. (c) A transmission matrix is used in the model, with two transmission coefficients  $\beta$  and  $\theta$ , where the latter is the specific coefficient for transmission within and between particular age-groups.  $\beta$  and  $\theta$  are estimated when fitting the survey data and can be any positive numbers. (d) Observational study data (surveys) per age-group, with means 0.23, 0.21, 0.20, 0.17 for vaccinated 3-5 years old (V3-5y, purple), 0.26, 0.21, 0.19, 0.18 for unvaccinated 6-7 years old (NV3-5y, green), 0.20, 0.16, 0.19, 0.13 for unvaccinated 8-9 years old (NV8-9y, orange); bars are the 95% CI.

402 **Figure 2: Model fit and estimated posteriors.** (a) Model fit to carriage data from the observational study for different age-groups: vaccinated 3-5 years old (V3-5y, purple), unvaccinated 404 6-7 years old (NV6-7y, green) and unvaccinated 8-9 years old (NV8-9y, orange). The survey data is represented with means as empty squares, the model output with means as full circles; the whiskers are the 95% CI. Grey and white areas mark the different surveys of the observational study. (b) 406 Priors (lines) and estimated posterior distributions (shaded) of duration of carriage per age-group. (c) Estimated mean and 95% CI of posterior of vaccine efficacy against vaccine-type carriage (red) 408 in the context of estimates from other studies (in legend, Table S2). (d) The estimated posterior distributions of the transmission coefficients  $\beta$  and  $\theta$  are shown in two dimensions (coloured area). 410 The estimated actual distribution for  $\beta$  is in the x-axis and  $\theta$  in the y-axis (visualised in grey). Note that, for visualisation purposes, the axes are  $\log_{10}$ -transformed and the grey distributions' height has 412 no scale (height is not quantified). (a,b,c,d) Solutions presented are obtained from sampling 414 100,000 parameter values from posteriors and simulating the dynamic model.

416 **Figure 3: Impact projections of vaccine-type carriage reduction.** (a) Projected reduction in 418 carriage relative to the pre-vaccination era for age-groups 0 years (magenta), 1 year (blue), 2 years (yellow) and 3-5 years (purple) old. (b) Projected reduction in carriage relative to the pre- 420 vaccination era for aggregated age-groups 0-5 years (green) and 6-9 years (red) old (with corresponding 95% CIs). (a,b) Solutions presented are obtained from sampling 100,000 parameter 422 values from posteriors and simulating the dynamic model. The shaded areas are red for the pre- vaccination period, yellow for the post-vaccination period with no carriage data, white for the post- vaccination period with survey carriage data, and grey for the post-vaccination projected period up 424 to 10 years. The grey arrows mark the year of PCV13 introduction and years of the four surveys.

426

428

430 **Figure 4: Time periods of fastest reduction in force of infection across ages.** The post-  
432 vaccination force of infection (FOI) of different age groups was calculated for each of 100,000  
434 simulations using parameter samples from posteriors. For each FOI time series of each age-group,  
436 the time point of minimum derivative was calculated as a proxy for the time period of fastest FOI  
438 reduction, resulting in one distribution per age-group (coloured curves, 0-5 years of age in green, 6-  
7 in blue, 8-9 in red). The shaded areas are red for the pre-vaccination period, yellow for the post-  
vaccination period with no carriage data, white for the post-vaccination period with survey carriage  
data, and grey for the post-vaccination projected period up to 10 years. The grey arrows mark the  
year of PCV13 introduction and years of the four surveys.

440 **Figure 5: Estimated vaccine-type carriage and sensitivity of impact projections to baseline**  
442 **transmission in the context of other studies. (a)** Estimated pre-vaccination vaccine-type carriage  
444 (and 95% CI) for the age-group 0-5 years of age (red) in the context of carriage levels reported in  
446 other studies (in legend, Table S5). **(b)** The baseline transmission coefficient ( $\beta$ ) is varied by  
448 considering the 70%, 60%, 50%, 40%, 30%, 20%, and 10% lower, and 10%, 20% higher  
450 transmission than the estimated for Blantyre (Malawi,  $\beta_{\text{Malawi}}$ ) when fitting the observational study  
(e.g. 10% lower is  $0.9 \cdot \beta_{\text{Malawi}}$ ). The impact projections for the age-group 0-5 years old using the  $\beta$   
estimated for Blantyre (Malawi) are presented by the dashed line (as in Figure 3b). For visual  
purposes only the means are shown, obtained from simulations sampling 100,000 parameter values  
from posteriors. The symbols and whiskers are measures of reported impact (carriage reduction)  
and 95% CIs for several published studies (in legend, Table S4). The grey arrows mark the year of  
PCV13 introduction and the years of the four surveys.

## 452 References

- 1 Brown J, Hammerschmidt S, Orihuela C, editors. *Streptococcus Pneumoniae: Molecular*  
454 *Mechanisms of Host-Pathogen Interactions*, 1st edn. Elsevier, 2015 DOI:10.1016/C2012-0-  
00722-3.
- 456 2 Levine OS, O'Brien KL, Knoll M, *et al.* Pneumococcal vaccination in developing countries.  
*Lancet* 2006; **367**: 1880–2.
- 458 3 Simell B, Auranen K, Käyhty H, Goldblatt D, Dagan R, O'Brien KL. The fundamental link  
between pneumococcal carriage and disease. *Expert Rev Vaccines* 2012; **11**: 841–55.
- 460 4 Weinberger DM, Malley R, Lipsitch M. Serotype replacement in disease after pneumococcal  
vaccination. *Lancet* 2011; **378**: 1962–73.
- 462 5 Watkins ER, Penman BS, Lourenço J, *et al.* Vaccination Drives Changes in Metabolic and  
Virulence Profiles of *Streptococcus pneumoniae*. *PLoS Pathog* 2015; **11**: e1005034.
- 464 6 Lourenço J, Wikramaratna P, Gupta S. MANTIS: an R package that simulates multilocus  
models of pathogen evolution. *BMC Bioinformatics* 2015; **16**: 176.
- 466 7 Ashby B, Watkins E, Lourenço J, Gupta S, Foster KR. Competing species leave many  
potential niches unfilled. *Nat Ecol Evol* 2017; **1**. DOI:10.1038/s41559-017-0295-3.
- 468 8 Melegaro A, Choi YH, George R, Edmunds WJ, Miller E, Gay NJ. Dynamic models of  
pneumococcal carriage and the impact of the Heptavalent Pneumococcal Conjugate Vaccine  
470 on invasive pneumococcal disease. *BMC Infect Dis* 2010; **10**: 90.
- 9 Bottomley C, Roca A, Hill PC, Greenwood B, Isham V. A mathematical model of serotype  
472 replacement in pneumococcal carriage following vaccination. *J R Soc Interface* 2013; **10**:  
20130786–20130786.
- 474 10 Adetifa IMO, Antonio M, Okoromah CAN, *et al.* Pre-vaccination nasopharyngeal  
pneumococcal carriage in a Nigerian population: Epidemiology and population biology.  
476 *PLoS One* 2012; **7**. DOI:10.1371/journal.pone.0030548.
- 11 Le Polain de Waroux O, Edmunds WJ, Takahashi K, *et al.* Predicting the impact of  
478 pneumococcal conjugate vaccine programme options in Vietnam. *Hum Vaccin Immunother*  
2018; **0**: 1–21.
- 480 12 Cohen R, Levy C, Bonnet E, *et al.* Dynamic of pneumococcal nasopharyngeal carriage in  
children with acute otitis media following PCV7 introduction in France. *Vaccine* 2010; **28**:  
482 6114–21.
- 13 Collins DA, Hoskins A, Snelling T, *et al.* Predictors of pneumococcal carriage and the effect  
484 of the 13-valent pneumococcal conjugate vaccination in the Western Australian Aboriginal  
population. *Pneumonia* 2017; **9**: 14.

- 486 14 Spijkerman J, van Gils EJM, Veenhoven RH, *et al.* Carriage of *Streptococcus pneumoniae* 3  
488 Years after Start of Vaccination Program, the Netherlands. *Emerg Infect Dis* 2011; **17**: 584–  
91.
- 15 Desai AP, Sharma D, Crispell EK, *et al.* Decline in pneumococcal nasopharyngeal carriage of  
490 vaccine serotypes after the introduction of the 13-valent pneumococcal conjugate vaccine in  
children in Atlanta, Georgia. *Pediatr Infect Dis J* 2015; **34**: 1168–74.
- 492 16 Bruce MG, Singleton R, Bulkow L, *et al.* Impact of the 13-valent pneumococcal conjugate  
494 vaccine (pcv13) on invasive pneumococcal disease and carriage in Alaska. *Vaccine* 2015; **33**:  
4813–9.
- 17 Hammitt LL, Akech DO, Morpeth SC, *et al.* Population effect of 10-valent pneumococcal  
496 conjugate vaccine on nasopharyngeal carriage of *Streptococcus pneumoniae* and non-  
typeable *Haemophilus influenzae* in Kilifi, Kenya: Findings from cross-sectional carriage  
498 studies. *Lancet Glob Heal* 2014; **2**: e397–405.
- 18 Hammitt L, Etyang AO, Morpeth SC, *et al.* Impact of 10-valent pneumococcal conjugate  
500 vaccine on invasive pneumococcal disease and nasopharyngeal carriage in Kenya. *bioRxiv*  
2018; published online Jan 1. <http://biorxiv.org/content/early/2018/07/18/369876.abstract>.
- 502 19 Heinsbroek E, Tafatatha T, Phiri A, *et al.* Pneumococcal carriage in households in Karonga  
504 District, Malawi, before and after introduction of 13-valent pneumococcal conjugate  
vaccination. *Vaccine* 2018. DOI:10.1016/j.vaccine.2018.10.021.
- 20 Roca A, Bojang A, Bottomley C, *et al.* Effect on nasopharyngeal pneumococcal carriage of  
506 replacing PCV7 with PCV13 in the Expanded Programme of Immunization in The Gambia.  
*Vaccine* 2015; **33**: 7144–51.
- 508 21 Nunes MC, Jones SA, Groome MJ, *et al.* Acquisition of *Streptococcus pneumoniae* in South  
510 African children vaccinated with 7-valent pneumococcal conjugate vaccine at 6, 14 and 40  
weeks of age. *Vaccine* 2015; **33**: 628–34.
- 22 Swarthout TD, Fronterre C, Lourenço J, *et al.* High residual prevalence of vaccine serotype  
512 *Streptococcus pneumoniae* carriage 4 to 6 years after introduction of 13-valent pneumococcal  
conjugate vaccine in Malawi: a prospective serial cross-sectional study. *bioRxiv* 2018;  
514 published online Jan 1. <http://biorxiv.org/content/early/2018/10/26/445999.abstract>.
- 23 Obolski U, Lourenço J, Thompson C, Thompson R, Gori A, Gupta S. Vaccination can drive  
516 an increase in frequencies of antibiotic resistance among nonvaccine serotypes of  
*Streptococcus pneumoniae*. *Proc Natl Acad Sci* 2018; **115**: 3102–7.
- 518 24 McCormick AW, Whitney CG, Farley MM, *et al.* Geographic diversity and temporal trends  
520 of antimicrobial resistance in *Streptococcus pneumoniae* in the United States. *Nat Med* 2003;  
**9**: 424–30.

- 25 Lehtinen S, Blanquart F, Croucher NJ, Turner P, Lipsitch M, Fraser C. Evolution of antibiotic  
522 resistance is linked to any genetic mechanism affecting bacterial duration of carriage. *Proc  
Natl Acad Sci* 2017; **114**: 1075–80.
- 524 26 Huang SS, Finkelstein JA, Lipsitch M. Modeling Community- and Individual-Level Effects  
526 of Child-Care Center Attendance on Pneumococcal Carriage. *Clin Infect Dis* 2005; **40**: 1215–  
22.
- 27 Van Effeltherre T, Moore MR, Fierens F, *et al.* A dynamic model of pneumococcal infection in  
528 the United States: Implications for prevention through vaccination. *Vaccine* 2010; **28**: 3650–  
60.
- 530 28 Flasche S, Ojal J, Le Polain de Waroux O, *et al.* Assessing the efficiency of catch-up  
532 campaigns for the introduction of pneumococcal conjugate vaccine: A modelling study based  
on data from PCV10 introduction in Kilifi, Kenya. *BMC Med* 2017; **15**: 1–10.
- 29 Melegaro A, Choi Y, Pebody R, Gay N. Pneumococcal carriage in United Kingdom families:  
534 Estimating serotype-specific transmission parameters from longitudinal data. *Am J  
Epidemiol* 2007; **166**: 228–35.
- 536 30 Melegaro A, Gay NJ, Medley GF. Estimating the transmission parameters of pneumococcal  
carriage in households. *Epidemiol Infect* 2004; **132**: 433–41.
- 538 31 Nurhonen M, Cheng AC, Auranen K. Pneumococcal Transmission and Disease In Silico: A  
540 Microsimulation Model of the Indirect Effects of Vaccination. *PLoS One* 2013; **8**.  
DOI:10.1371/journal.pone.0056079.
- 32 Auranen K, Mehtälä J, Tanskanen A, S. Kaltoft M. Between-strain competition in acquisition  
542 and clearance of pneumococcal carriage epidemiologic evidence from a longitudinal study of  
day-care children. *Am J Epidemiol* 2010; **171**: 169–76.
- 544 33 Erästö P, Hoti F, Granat SM, Mia Z, Mäkelä PH, Auranen K. Modelling multi-type  
546 transmission of pneumococcal carriage in Bangladeshi families. *Epidemiol Infect* 2010; **138**:  
861–72.
- 34 Le Polain De Waroux O, Flasche S, Prieto-Merino D, Goldblatt D, Edmunds WJ. The  
548 efficacy and duration of protection of pneumococcal conjugate vaccines against  
nasopharyngeal carriage: A meta-regression model. *Pediatr Infect Dis J* 2015; **34**: 858–64.
- 550 35 Ojal J, Griffiths U, Hammitt LL, *et al.* The merits of sustaining pneumococcal vaccination  
552 after transitioning from Gavi support - a modelling and cost-effectiveness study for Kenya.  
*bioRxiv* 2018; published online Jan 1.  
<http://biorxiv.org/content/early/2018/07/18/369603.abstract>.
- 554 36 Satzke C, Turner P, Virolainen-Julkunen A, *et al.* Standard method for detecting upper  
556 respiratory carriage of *Streptococcus pneumoniae*: Updated recommendations from the  
World Health Organization Pneumococcal Carriage Working Group. *Vaccine* 2013; **32**: 165–  
79.

- 558 37 Lourenço J, de Lima MM, Faria NR, *et al.* Epidemiological and ecological determinants of  
Zika virus transmission in an urban setting. *Elife* 2017; **6**. DOI:10.7554/eLife.29820.
- 560 38 McNaughton A, Lourenco J, Hattingh L, *et al.* Utilising a Cohort Study of Hepatitis B Virus  
562 (HBV) Vaccine-Mediated Immunity in South African Children to Model Infection Dynamics:  
Can We Meet Global Targets for Elimination by 2030? *bioRxiv* 2017; published online July  
12. <http://biorxiv.org/content/early/2017/07/12/162594.abstract>.
- 564 39 Faria NR, da Costa AC, Lourenço J, *et al.* Genomic and epidemiological characterisation of a  
dengue virus outbreak among blood donors in Brazil. *Sci Rep* 2017; **7**: 15216.
- 566 40 Weiser JN, Ferreira DM, Paton JC. Streptococcus pneumoniae: Transmission, colonization  
and invasion. *Nat Rev Microbiol* 2018; **16**: 355–67.
- 568 41 Hogberg L, Geli P, Ringberg H, Melander E, Lipsitch M, Ekdahl K. Age- and Serogroup-  
570 Related Differences in Observed Durations of Nasopharyngeal Carriage of Penicillin-  
Resistant Pneumococci. *J Clin Microbiol* 2007; **45**: 948–52.
- 572 42 le Polain de Waroux O, Cohuet S, Ndazima D, *et al.* Characteristics of human encounters and  
social mixing patterns relevant to infectious diseases spread by close contact: A survey in  
Southwest Uganda. *BMC Infect Dis* 2018; **18**: 1–12.
- 574 43 Althouse BM, Hammitt LL, Grant L, *et al.* Identifying transmission routes of Streptococcus  
576 pneumoniae and sources of acquisitions in high transmission communities. *Epidemiol Infect*  
2017; **145**: 2750–8.
- 578 44 Ojal J, Flasche S, Hammitt LL, *et al.* Sustained reduction in vaccine-type invasive  
pneumococcal disease despite waning effects of a catch-up campaign in Kilifi, Kenya: A  
mathematical model based on pre-vaccination data. *Vaccine* 2017; **35**: 4561–8.
- 580 45 Camilli R, Daprai L, Cavrini F, *et al.* Pneumococcal Carriage in Young Children One Year  
after Introduction of the 13-Valent Conjugate Vaccine in Italy. *PLoS One* 2013; **8**: 1–10.
- 582 46 Mossong J, Hens N, Jit M, *et al.* Social contacts and mixing patterns relevant to the spread of  
infectious diseases. *PLoS Med* 2008; **5**: 0381–91.
- 584 47 Kiti MC, Kinyanjui TM, Koech DC, Munywoki PK, Medley GF, Nokes DJ. Quantifying age-  
586 related rates of social contact using diaries in a rural coastal population of Kenya. *PLoS One*  
2014; **9**. DOI:10.1371/journal.pone.0104786.
- 588 48 Loughlin AM, Hsu K, Silverio AL, Marchant CD, Pelton SI. Direct and indirect effects of  
PCV13 on nasopharyngeal carriage of PCV13 unique pneumococcal serotypes in  
Massachusetts' children. *Pediatr Infect Dis J* 2014; **33**: 504–10.
- 590 49 Hammitt LL, Bruden DL, Butler JC, *et al.* Indirect Effect of Conjugate Vaccine on Adult  
592 Carriage of *Streptococcus pneumoniae*: An Explanation of Trends in Invasive Pneumococcal  
Disease. *J Infect Dis* 2006; **193**: 1487–94.



- 50 Van Hoek AJ, Sheppard CL, Andrews NJ, *et al.* Pneumococcal carriage in children and adults  
594 two years after introduction of the thirteen valent pneumococcal conjugate vaccine in  
England. *Vaccine* 2014; **32**: 4349–55.
- 596 51 Mameli C, Fabiano V, Daprai L, *et al.* A longitudinal study of streptococcus pneumoniae  
598 carriage in healthy children in the 13-valent pneumococcal conjugate vaccine era. *Hum  
Vaccin Immunother* 2015; **11**: 811–7.
- 52 McCollum ED, Nambiar B, Deula R, *et al.* Impact of the 13-valent pneumococcal conjugate  
600 vaccine on clinical and hypoxemic childhood pneumonia over three years in central Malawi: An  
602 observational study. *PLoS One* 2017; **12**: 1–17.

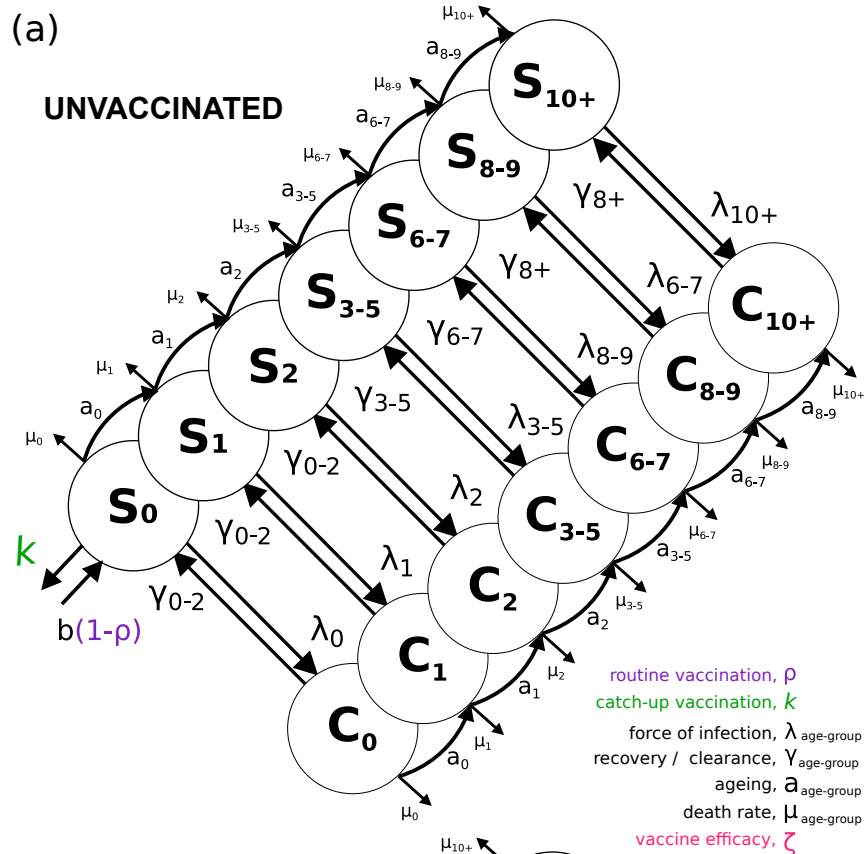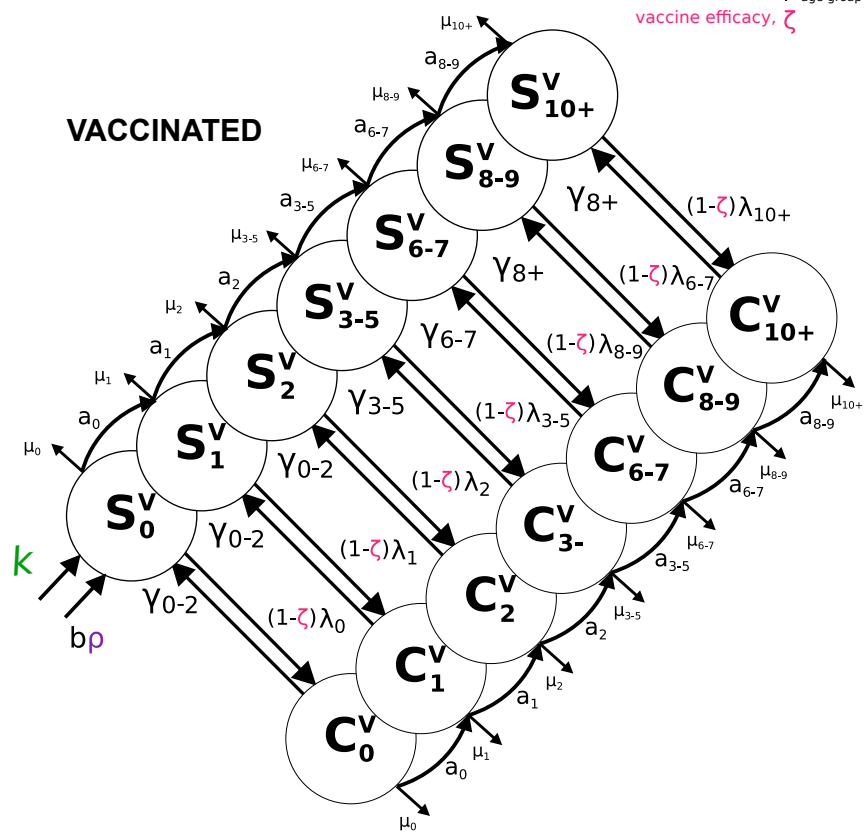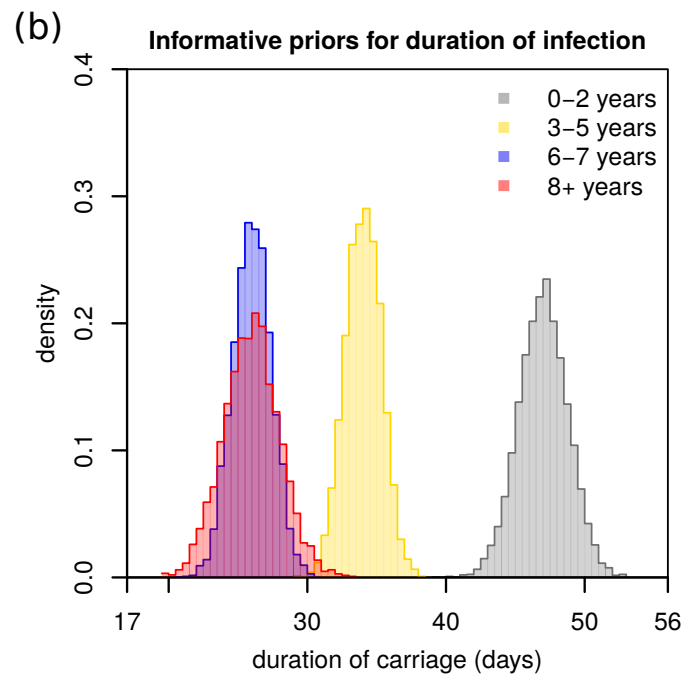

(c) **Transmission matrix**

|                 |          |          |          |          |          |          |         |         |
|-----------------|----------|----------|----------|----------|----------|----------|---------|---------|
| transmission to | 10+      | $\beta$  | $\beta$  | $\beta$  | $\beta$  | $\beta$  | $\beta$ | $\beta$ |
| 8-9             | $\beta$  | $\beta$  | $\beta$  | $\beta$  | $\beta$  | $\theta$ | $\beta$ | $\beta$ |
| 6-7             | $\beta$  | $\beta$  | $\beta$  | $\beta$  | $\theta$ | $\beta$  | $\beta$ | $\beta$ |
| 3-5             | $\theta$ | $\theta$ | $\theta$ | $\theta$ | $\beta$  | $\beta$  | $\beta$ | $\beta$ |
| 2               | $\theta$ | $\theta$ | $\theta$ | $\theta$ | $\beta$  | $\beta$  | $\beta$ | $\beta$ |
| 1               | $\theta$ | $\theta$ | $\theta$ | $\theta$ | $\beta$  | $\beta$  | $\beta$ | $\beta$ |
| 0               | $\theta$ | $\theta$ | $\theta$ | $\theta$ | $\beta$  | $\beta$  | $\beta$ | $\beta$ |
|                 | 0        | 1        | 2        | 3-5      | 6-7      | 8-9      | 10+     |         |

transmission from

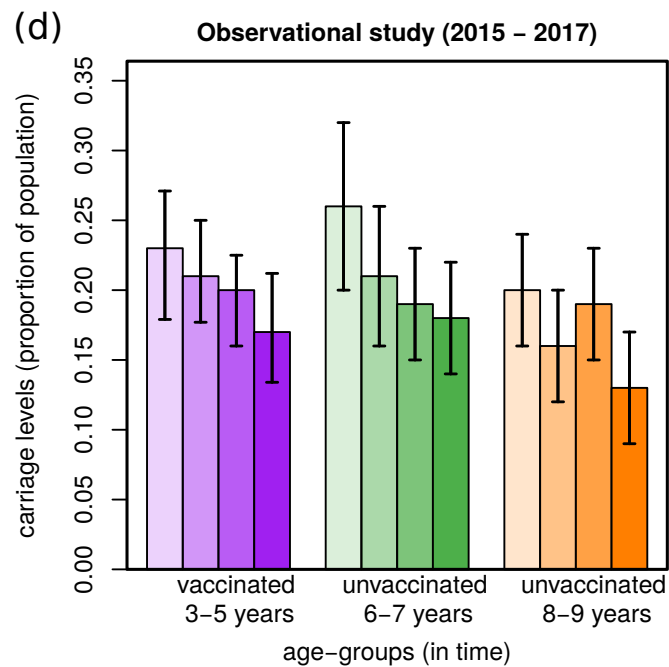

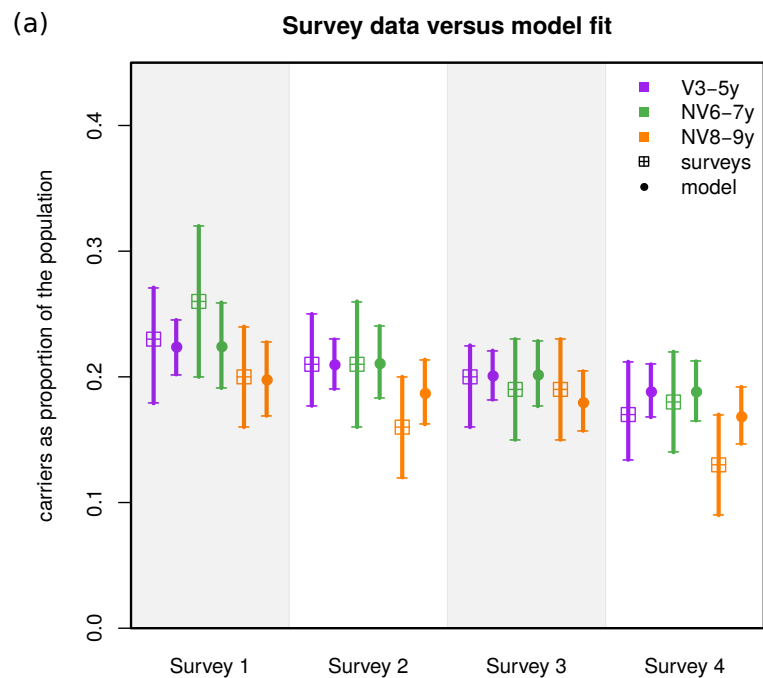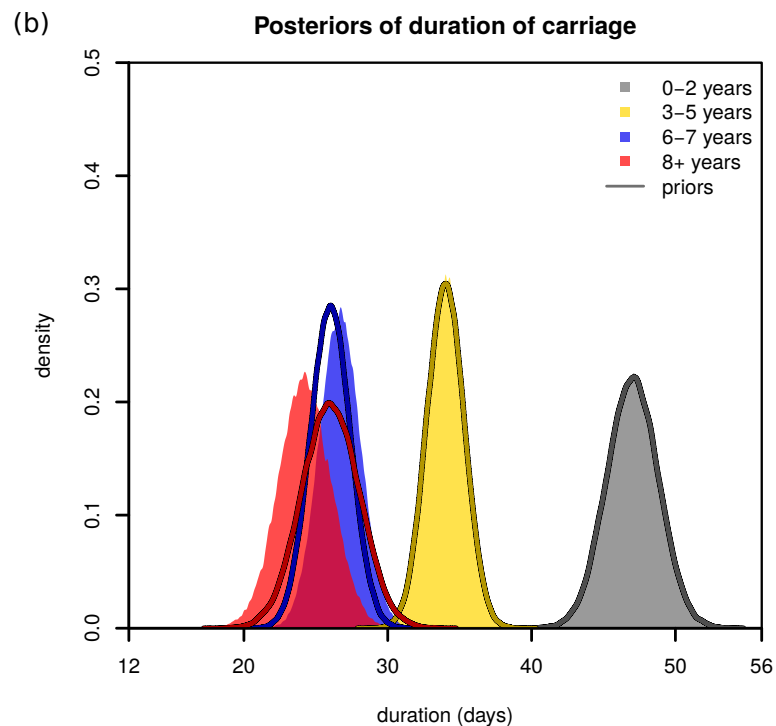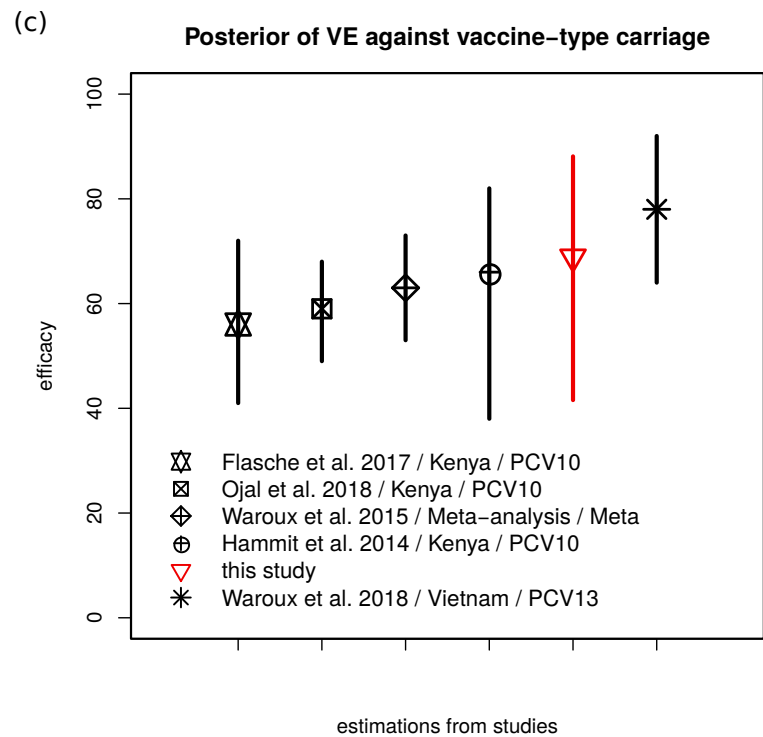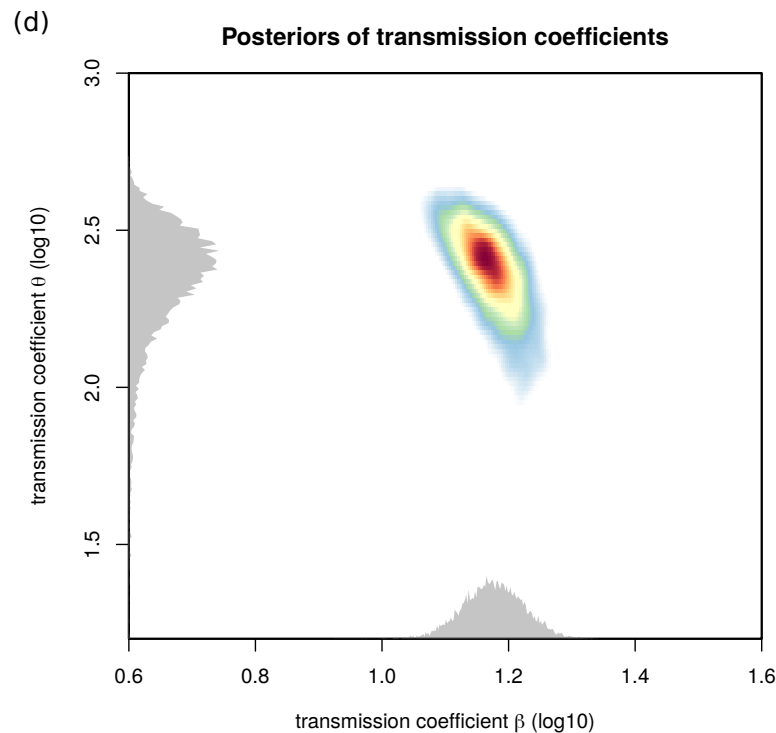

(a) **Projected reduction in carriage for first 10 years post-vaccination**

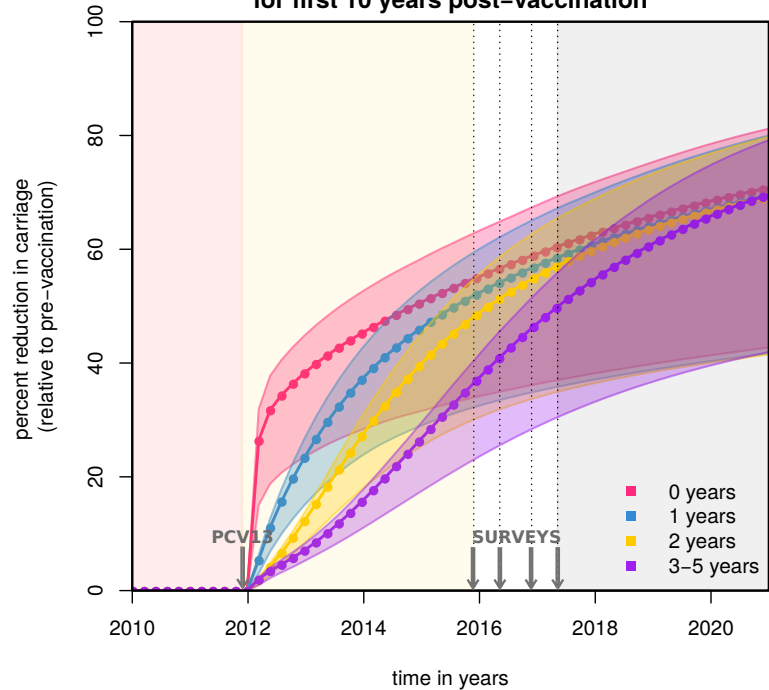

(b) **Projected reduction in carriage for first 10 years post-vaccination**

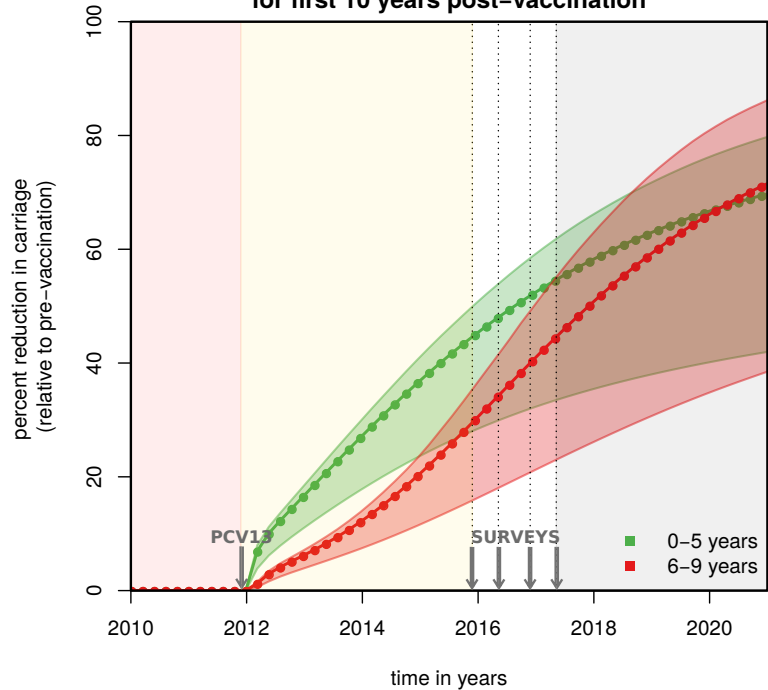

## Time period of fastest FOI reduction

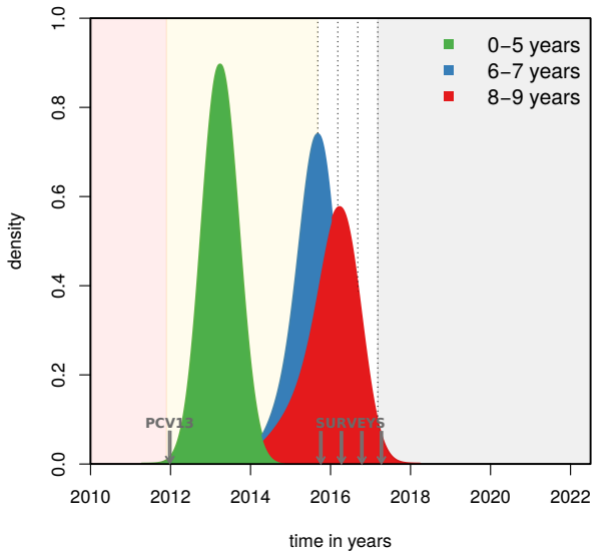

(a) Pre-vaccination VT carriage (0–5 years)

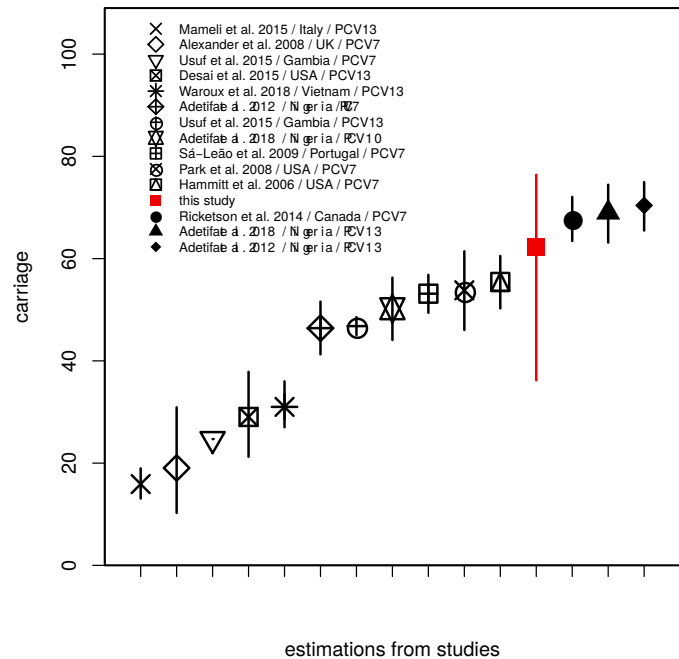

(b) Projected reduction in VT carriage (0–5 years)

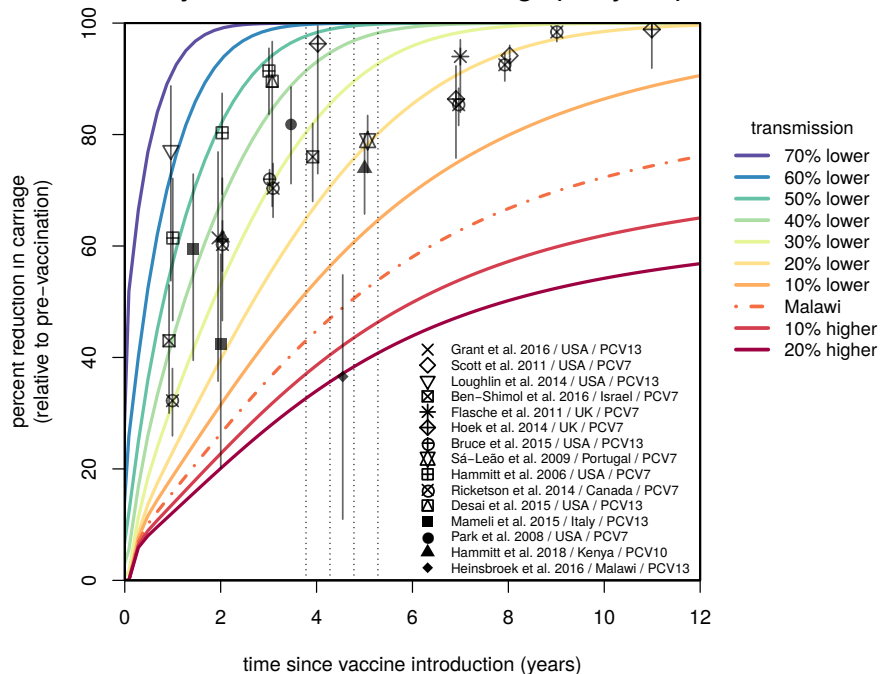

Source: https://www.biorxiv.org/content/10.1101/477695v1.full.pdf
